# Supplementary material for: Construction of Mn–N–C nanoparticles with multienzyme-like properties and photothermal performance for the effective treatment of bacterial infections
Source: Royal Society of Chemistry journal article supplement (doi:10.1039/d3bm01228j), 2023-11-22
Supplement: d3bm01228j1.pdf [file d3bm01228j1.pdf]

## Supplementary Information

Construction of Mn-N-C nanoparticles with multienzyme-like properties and photothermal performance for effectively treating bacterial infections

Yong Ding,<sup>a</sup> Xiao-Chan Yang,<sup>a</sup> Ya-Ya Yu,<sup>a</sup> Sheng-Nan Song,<sup>a</sup> Bo Li,<sup>a</sup> Xue-Yao Pang,<sup>a</sup> Jian-Jian Cai,<sup>b</sup> Chun-Huan Zhang,<sup>b</sup> Shan Huang,<sup>a,c</sup> Ya-Mu Xia<sup>\*a</sup>, Wei-Wei Gao<sup>\*a</sup>

<sup>a</sup> State Key Laboratory Base of Eco-chemical Engineering, College of Chemical Engineering, Qingdao University of Science and Technology, Qingdao 266042, China

<sup>b</sup> Township Central Clinic of Masanzi, Binzhou 251907, China

<sup>c</sup> The Third Affiliated Hospital of Xuzhou Medical University, Xuzhou 221000, China

\* Corresponding Address:

gww501@qust.edu.cn (W.-W. Gao); xiayamu@126.com (Y.-M. Xia)

### 1. Chemicals and reagents

Zn(NO<sub>3</sub>)·6H<sub>2</sub>O, hydrogen peroxide (30%), 5,5'-dithiobis(2-nitrobenzoic acid) (DTNB), *N,N*-dimethylformamide (DMF), and *o*-phenylenediamine were purchased from Sinopharm Chemical Reagent Co. Ltd. 2-Methylimidazole, poly(ethylene glycol) (PEG<sub>2000</sub>), 3-propyl-2-[5-(3-propyl-2(3H)-benzothiazolydene)-1,3-pentadien-1-yl]-iodide(1:1) [diSC3(5)], and crystal violet (CV) were obtained from Aladdin Reagent (Shanghai, China). 3,3',5,5'-tetramethylbenzidine (TMB), *o*-phenylenediamine, 5,5-dimethyl-1-pyrroline-*N*-oxide (DMPO) and glutathione (GSH) were obtained from Sigma-Aldrich. All other chemicals were reagent grade or better. All reagents and solvents were used as received. The deionized water of resistivity 18.2 MΩ cm<sup>-1</sup> was used in all experiments. MRSA and AREC were provided by Sichuan Provincial People's Hospital, Chengdu, China.

### 2. Apparatus

Scanning electron microscopy (SEM) images were obtained on a JEOL JSM-6700F at a working voltage of 15 kV after platinum coating for 90 s. Transmission electron microscopy (TEM), energy dispersive X-ray spectroscopy (EDS) and EDS element mapping were acquired on the Talos F200X (integrated with Super-X EDS). XPS (X-ray photoelectron spectrometry, AXIS SUPRA) and XRD (X-ray diffraction, ULTIMALV) were employed to evaluate the phase composition of the samples on a X-ray diffractometer (Cu K<sub>α</sub> radiation,  $k = 0.15406$  nm). UV-vis absorbance measurements were carried out on a PEERSEE TU-1810 UV-vis spectrophotometer. The ζ-potential and size of the Mn-N-C NPs was

measured in a Zetasizer 3000HS analyzer. All electron spin resonance (ESR) measurements were carried out on a JEOL JES FA200 spectrometer at ambient temperature. [Wound temperature changes in mice during treatment were photographed using an infrared thermography camera \(TOPLIA TMi 120S\).](#)

### 3. Calculation of the photothermal conversion efficiency ( $\eta$ ) of Mn-N-C NPs

Mn-N-C NPs aqueous solutions with different concentrations (0–200  $\mu\text{g mL}^{-1}$ ) were exposed to an 808 nm laser irradiation ( $1.0 \text{ W cm}^{-2}$ ) for 600 s, and the temperature was recorded every 30 s by a thermocouple probe. Mn-N-C NPs aqueous dispersion (0.2 mL) with different concentrations (0, 25, 50, 100, and 200  $\mu\text{g mL}^{-1}$ ) were exposed to an 808 nm laser irradiation ( $1.0 \text{ W cm}^{-2}$ ) for 600 s, then shutted off the laser for cooling the solution to room temperature. Heating and cooling temperature patterns of 20  $\mu\text{g mL}^{-1}$  Mn-N-C NPs were recorded. The  $\eta$  of Mn-N-C NPs was calculated according to the following equations:

$$\eta = [hS(T_{max} - T_{surr}) - Q_{diss}] / I(1 - 10^{-A_{808}}) \quad (\text{S1})$$

$$\tau_s = mC_p / hS \quad (\text{S2})$$

Where  $h$  is the heat-transfer coefficient,  $S$  is the surface area of the container,  $T_{max}$  is the equilibrium temperature,  $T_{surr}$  is the ambient temperature,  $Q_{diss}$  is the heat obtained by container under 808 nm laser irradiation,  $I$  is the density of laser power,  $A_{808}$  is the absorbance of the Mn-N-C NPs suspension at 808 nm, and  $\tau_s$  is the time constant obtained from Figure S2.

### 4. Peroxidase-like catalytic activity

The peroxidase (POD)-like catalytic assays of materials were carried out using 3,5,3',5'-tetramethylbenzidine (TMB) and o-phenylenediamine (OPD) as the reagents in the presence of  $\text{H}_2\text{O}_2$  in 0.14 M acetate buffer solution (pH 3.0–8.0). The UV-vis absorbance of the color reaction (at 652 nm for ox TMB and at 445 nm for ox OPD) was recorded at a certain reaction time to express the POD-like activity.

### 5. Kinetic assay

The steady-state kinetic assay of Mn-N-C NPs with  $\text{H}_2\text{O}_2$  as the substrate was performed by adding 50  $\mu\text{g/mL}$  Mn-N-C NPs into 0.2 M HAc-NaAc buffer solution (pH 4.0) containing TMB (1 mM) and different concentrations of  $\text{H}_2\text{O}_2$  (0.125, 0.25, 0.5, 1, 2, 4, 8 mM). The Michaelis constant ( $K_M$ ) is defined as the substrate concentration at half the maximum reaction rate.  $K_M$  reflects the affinity of Mn-N-C NPs for its substrate. Maximal reaction velocity ( $V_{max}$ ) is the maximal reaction rate that is observed at saturating substrate concentrations. The kinetics constants  $K_M$  and  $V_{max}$  were calculated through fitting the initial reaction velocity ( $V$ ) values and the substrate concentrations to equations S3-S5.

$$V = (V_{max} \times [S]) / (K_M + [S]) \quad (\text{S3})$$

Where  $[S]$  is the concentration of substrate,  $V$  is the initial velocity and is calculated using the following equation:

$$V = \Delta A / (\Delta t \times \varepsilon \times l) \quad (S4)$$

where  $\Delta A$  is the change of absorbance value,  $\Delta t$  is the initial reaction time (s),  $\varepsilon$  is the molar absorption coefficient of the colorimetric substrate, which is typically  $39\,000\text{ M}^{-1}\text{ cm}^{-1}$  at 652 nm for oxidized TMB, and  $l$  is the path length of light traveling in the cuvette (cm).

The catalytic constant ( $k_{\text{cat}}$ ) is defined as the maximum number of substrate molecules converted to product per unit of time and is calculated by the following equation:

$$k_{\text{cat}} = V_{\text{max}} / [E] \quad (S5)$$

where  $[E]$  is the concentration of Mn-N-C NPs (M).

$k_{\text{cat}}/K_M$  characterizes both the affinity and catalytic ability of the enzyme to the substrate, reflecting the catalytic efficiency of Mn-N-C NPs.

## 6. Superoxide dismutase-like catalytic activity

The superoxide dismutase (SOD)-like catalytic assays were carried out at room temperature by measuring the inhibition of autooxidation of pyrogallol. In detail, chemicals were added into 1 mL of Tris-HCl (0.1 mM, pH 8.2) buffer solution in the following order: 100  $\mu\text{L}$  pyrogallol-HCl (final pyrogallol concentration 0.20 mM, pH 2.0), and (or without) 100  $\mu\text{L}$  materials (final concentration 50  $\mu\text{g}/\text{mL}$ ) to form a uniform system. The SOD-like activity was assessed by measuring the oxidation peak at 320 nm using a UV-vis spectrophotometer.

## 7. Catalase-like catalytic activity

The catalase (CAT)-like catalytic assays of materials were carried out by measuring the rate of oxygen production using a SevenExcellence<sup>TM</sup> Benchtop Meter. The total volume of the reaction system was 4.5 mL, including  $\text{H}_2\text{O}_2$  (75 mM), materials (100  $\mu\text{g}/\text{mL}$ ) and 0.1 M citric acid- $\text{Na}_2\text{HPO}_4$  buffer. The pH sensitivity of the catalase-like activity was evidenced by varying the buffer pH from 5.5 to 7.5. The catalase comes from cow liver, 3500 units/mg.

## 8. Oxidase-like catalytic activity

The OXD-like activity was assessed by adding different time in 0.01 M HAc-NaAc buffer (pH= 5.0), after that 0.1 mM TMB was added and the mixture was incubated for 5 min at 25 °C. The final 652 nm absorbance of mixture was detected by a Bio-Rad 680 microplate reader.

## 9. GSH consumption

Glutathione (GSH) oxidation was examined by Ellman's assay and all the experiments were carried out in the dark. Ellman reagent 5,5'-dithiobis(2-nitrobenzoic acid) (DTNB) reacted with thiol groups (-SH) in GSH by cleaving its disulfide bonds (-S-S-) to obtain a yellow product 2-nitro-5-thiobenzoate

acid. To confirm the concentration-dependent GSH consumption, Mn-N-C NPs (100, 80, 60, 40, 20 and 0  $\mu\text{g}/\text{mL}$ ) and  $\text{H}_2\text{O}_2$  (140  $\mu\text{M}$ ) were treated with GSH (225  $\mu\text{L}$ , 0.8 mM) in PBS at 37  $^\circ\text{C}$  for 1 h. Similarly, Mn-N-C NPs (100  $\mu\text{L}$ , 0.8 mM) was co-incubated with GSH (225  $\mu\text{L}$ , 0.8 mM) in PBS at varied time (0, 20, 40, 60, 80, 100 and 120 min) to investigate time-dependent GSH consumption. The above solution mixed with DTNB (15  $\mu\text{L}$ , 10 mM). Next, the mixture solution was centrifugated and the supernatant was required for the GSH depletion measurement by UV-Vis absorption spectra. The loss of GSH was calculated as follows:

$$\text{Loss of GSH (\%)} = (A_n - A_s) / A_n \times 100 \quad (\text{S6})$$

where  $A_s$  and  $A_n$  are the absorbance of the sample and negative control.

### 10. Antibacterial experiments *in vitro*

The antibacterial ability of Mn-N-C NPs was determined by plate counting method. Briefly, bacteria suspensions ( $2 \times 10^8$  CFU  $\text{mL}^{-1}$ , 100  $\mu\text{L}$ ) were incubated with PBS (control),  $\text{H}_2\text{O}_2$  (140  $\mu\text{M}$ ),  $\text{Mn}(\text{acac})_3@ZIF-8$  (25  $\mu\text{g mL}^{-1}$ ),  $\text{Mn}(\text{acac})_3@ZIF-8$  (25  $\mu\text{g mL}^{-1}$ )+ $\text{H}_2\text{O}_2$  (140  $\mu\text{M}$ ), Mn-N-C NPs (25  $\mu\text{g mL}^{-1}$ ), Mn-N-C NPs (25  $\mu\text{g mL}^{-1}$ )+ $\text{H}_2\text{O}_2$  (140  $\mu\text{M}$ ) in a 96-well plate, respectively. After incubated at 37  $^\circ\text{C}$  for 20 min, the bacteria suspension (diluted by  $1-10^4$  fold, 100  $\mu\text{L}$ ) was spread on the LB agar plates. The number of bacteria colonies was counted and recorded after incubation for 24 h at 37  $^\circ\text{C}$ .

### 11. Protein leakage

MRSA and AREC cells ( $10^6$  CFU/ $\text{mL}$ ) were treated with increasing concentrations of Mn-N-C NPs and 140  $\mu\text{M}$  of  $\text{H}_2\text{O}_2$  for 1 h at 37  $^\circ\text{C}$  and then irradiated for 3 min under 808 nm NIR ( $1.0 \text{ W cm}^{-2}$ ). Subsequently, the cells were pelleted down at 5000 rpm for 5 min, and the cell-free supernatant was collected. The concentration of leaked proteins in the supernatant was measured using the standard Bradford assay.

### 12. Cytoplasmic membrane depolarization

The membrane potential-sensitive fluorescent dye, diSC3(5), was employed as an indicator of membrane depolarization. Overnight cultured bacteria were diluted in a fresh LB broth and cultured to the mid log phase. AREC and MRSA cells were collected by centrifugation and washed with 5 mM PBS and 5 mM glucose. Following that, 1950  $\mu\text{L}$  of the bacterial suspension and 50  $\mu\text{L}$  of 20  $\mu\text{M}$  diSC3(5) were added. The fluorescence of the suspension was monitored at room temperature for 20 min at an excitation wavelength of 622 nm and an emission wavelength of 670 nm. Mn-N-C NPs (0, 20, 30, 40 and 50  $\mu\text{g}/\text{mL}$ ) and 140  $\mu\text{M}$  of  $\text{H}_2\text{O}_2$  were added into the cuvette and the increased potential was monitored after irradiated for 3 min under 808 nm NIR ( $1.0 \text{ W cm}^{-2}$ ).

### 13. Biofilm viability

Biofilm formation assays were performed as previously described with some changes. Overnight cultures of MRSA were resuspended in fresh medium ( $OD_{600}$  of approximately 0.1). Aliquots of 100  $\mu$ L of bacterial suspension and final concentrations of 0, 25, 50, 100, 200 and 400  $\mu$ g/mL of Mn-N-C NPs +H<sub>2</sub>O<sub>2</sub> (140  $\mu$ M) were co-stored in a 96-well plate at 37 °C for 24 h. The medium was removed from the wells and the biofilm was carefully washed twice with PBS to remove planktonic bacteria. The biofilms were fixed with 10% ethanol for 10 min, and then stained with 0.1% crystal violet (CV) for 20 min in each well. After discarding CV, the biofilm samples were washed with PBS, and 33% AcOH was added to dissolve the dye on the biofilm, then the absorbance at 570 nm was measured using a microplate reader (Tecan Infinite M200 Pro). The percentage viability of the treated biofilm relative to the control was calculated.

#### **14. Bacterial resistance**

The strains of MRSA were exposed to sub-MICs of Mn-N-C NPs for sustained passages, and then the MICs of Mn-N-C NPs were determined against each passage of the strain. The freshly diluted MRSA ( $1.0 \times 10^5$  CFU) in the broth medium were cultured in 25  $\mu$ g/mL Mn-N-C NPs and 140  $\mu$ M H<sub>2</sub>O<sub>2</sub> at 37 °C for 12 h on a shaker bed at 90 rpm, and the sensitivity of each strain passage to Mn-N-C NPs was tested. For comparative analysis, ceftizoxime was used as a control.

#### **15. Cytotoxicity measurement**

Cytotoxicity evaluation was performed on Human umbilical vein endothelial cells lines (HUVEC). These cells were implanted into 96-well microplates and permitted to adhere overnight. Subsequently, the culture medium was substituted by fresh culture medium including different samples [PBS, H<sub>2</sub>O<sub>2</sub> (5 mM), Mn(acac)<sub>3</sub>@ZIF-8 (50  $\mu$ g/mL), Mn(acac)<sub>3</sub>@ZIF-8 (50  $\mu$ g/mL)+H<sub>2</sub>O<sub>2</sub> (5 mM), Mn-N-C NPs (50  $\mu$ g/mL) and Mn-N-C NPs (0–200  $\mu$ g/mL) +H<sub>2</sub>O<sub>2</sub> (5 mM)], respectively. After the co-incubation for 24 h, the culture medium was substituted by MTT (20  $\mu$ g/mL) culture solution and incubation for 4 h. Ultimately, dimethyl sulfoxide (150  $\mu$ L) was added to each well. Cell viability was calculated by measuring the absorbance at  $\lambda = 490$  nm to the control via a microplate reader.

#### **16. Hemocompatibility evaluation**

Fresh blood from mice was taken and erythrocytes were isolated by centrifugation (1,000 rpm, 10 min). The obtained erythrocytes were washed three times with saline and then diluted to a final concentration of 5% (v/v). The Mn-N-C NPs +H<sub>2</sub>O<sub>2</sub> (500  $\mu$ L) with erythrocyte solution (500  $\mu$ L) was added into a 24-well microtiter plate and then shaken at 150 rpm for 1 h in an incubator at 37 °C. Afterwards, the microplate contents were centrifuged (1000 rpm, 10 min) and the supernatant (100  $\mu$ L) was introduced into a 96-well microplate. The absorbance of the solution at 540 nm was determined using a microplate reader (Tecan Infinite M200 Pro). Triton X-100 (0.1%) was used as a positive control. The percentage hemolysis was calculated based on the following relationship:

$$\text{Hemolysis percentage (\%)} = [(A_p - A_b) / (A_c - A_b)] \times 100\% \quad (\text{S7})$$

where  $A_p$ ,  $A_b$ , and  $A_c$  are the absorbance values of the experimental group, Triton X-100 positive control and saline, respectively.

## 17. Mice wound model

All animal experiments in this study were approved and compliant with the guidelines of the Institutional Animal Care and Use Committee (IACUC) of Qingdao University of Science and Technology. Male Kunming mice (28–32 g, 5–6 weeks old) were purchased from the Model Animal Research Center (MARC) of Jinan Pengyue Co. Ltd. (JiNan, China). All the mice were divided into seven groups, each group had six mice for conducting parallel experiments. The wound model was built on the back of mice, and each mouse was anaesthetized by isoflurane aerosol and then slashed an 8 mm full-thickness skin wound. MRSA strains ( $3 \times 10^7$  CFU, 50  $\mu$ L) were injected into each wound for constructing the infected wound model.

After 24 h, the infected mice were anaesthetized again, and then PBS, H<sub>2</sub>O<sub>2</sub>, Mn-N-C NPs, and Mn-N-C NPs + H<sub>2</sub>O<sub>2</sub> were respectively dropwise into the wound for dispersed evenly in each group. After about 10 min, all the mice woke up and moved normally. The above experimental procedures were repeated every day until the fifth day, that was anaesthetizing mice, treating wound with PBS, H<sub>2</sub>O<sub>2</sub>, Mn-N-C NPs, and Mn-N-C NPs+H<sub>2</sub>O<sub>2</sub> respectively. Meanwhile, photographs of the wounds were taken every three days.

For histological analysis, the mice were sacrificed with an overdose of pentobarbital (100 mg·kg<sup>-1</sup>) on day 5. The entire wound with adjacent normal skin was collected and fixed using 4% paraformaldehyde solution for 24 h at 4 °C. The sample of subcutaneous tissue was analyzed using H&E staining method. All sections were observed and photographed with a microscope (BX51, Olympus, Japan), meanwhile, the wound was excised and incubated in sterile saline for 24 h at 37 °C. Then, the culture solution was diluted 100-fold and cultured on LB agar plates at 37 °C for 24 h for counting the number of bacterial colonies. The wound healing rate was calculated as follows:

$$\text{Wound healing rate (\%)} = (A_{\text{initial}} - A_{\text{time}}) / A_{\text{initial}} \times 100 \quad (\text{S8})$$

where  $A_{\text{initial}}$  is the initial wound area (day 0), and  $A_{\text{time}}$  is the wound area at different time points.

## 18. Statistical analysis

All data were raw data and expressed as mean  $\pm$  standard deviation (mean  $\pm$  SD). The sample size (n) for each statistical analysis was given in each Figure legend. Two-factor ANOVA was used to evaluate the effects of different materials treatments and NIR irradiation on bacterial inhibition rate (Figure 7a, b) or wound healing (Figure 12a, b). The statistical analysis was conducted using Origin 2023b software. Statistical difference was defined as \*p < 0.05, \*\*p < 0.01, \*\*\*p < 0.001.

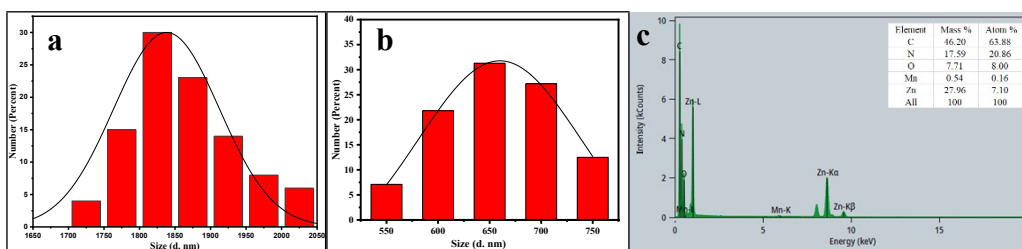

**Figure S1.** The size distribution histogram of (a)  $\text{Mn}(\text{acac})_3@ZIF-8$  and (b) Mn-N-C NPs; (c) EDS mapping of Mn-N-C NPs.

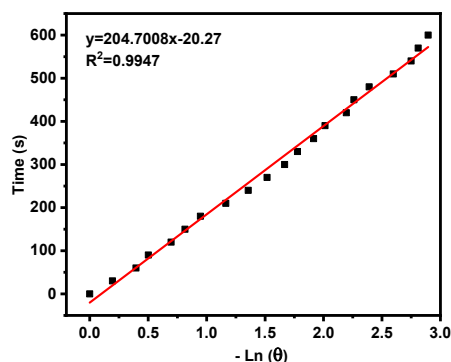

**Figure S2.** The cooling time plot after 600s vs the negative natural logarithm of driving force temperature ( $-\ln\theta$ ) with slope of 204.70 for the concentration of  $25 \mu\text{g mL}^{-1}$ .

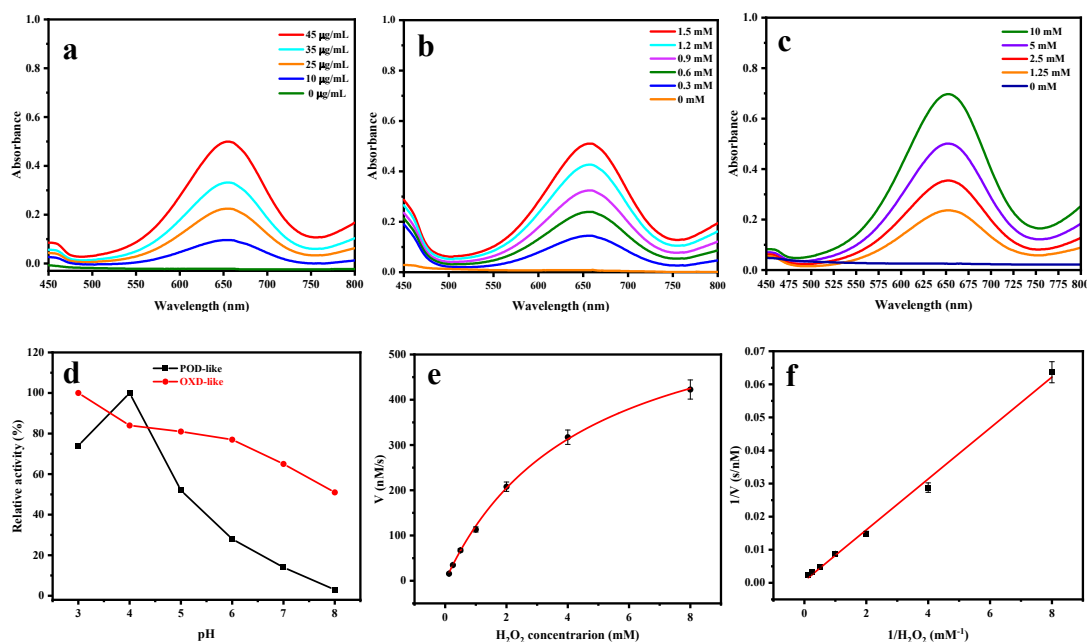

**Figure S3.** Effect of (a) Mn-N-C NPs concentration, (b) TMB concentration and (c)  $\text{H}_2\text{O}_2$  concentration on the efficiency of  $\cdot\text{OH}$  production for  $\text{TMB}+\text{Mn-N-C NPs}+\text{H}_2\text{O}_2$ ; (d) Effect of pH values on the both POD-like and OXD-like catalytic performance; (e) Kinetic assay for the POD-like activity of Mn-N-C NPs with  $\text{H}_2\text{O}_2$  as substrate; (f) Corresponding double-reciprocal plots of POD-like activity of Mn-N-C NPs at a fixed concentration of TMB (1 mM) versus varying concentration of  $\text{H}_2\text{O}_2$  (0.125, 0.25, 0.5, 1, 2, 4, 8 mM), data presented as mean  $\pm$  SD ( $n = 3$ ).

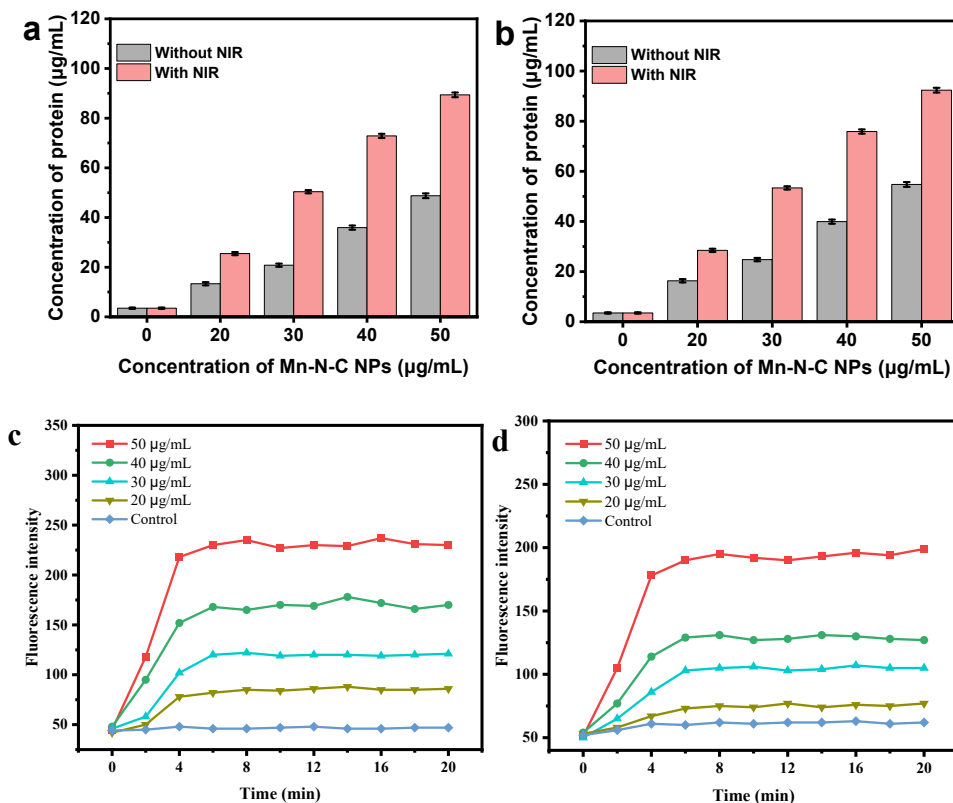

**Figure S4.** Protein leakage of (a) MRSA and (b) AREC treated with Mn-N-C NPs+ H<sub>2</sub>O<sub>2</sub> (NIR, 808 nm, 1.0 W cm<sup>-2</sup>, 3 min); Membrane depolarization of (c) MRSA and (d) AREC in the presence of Cu<sub>2</sub>O-DMB+H<sub>2</sub>O<sub>2</sub>+NIR (808 nm, 1.0 W cm<sup>-2</sup>, 3 min).

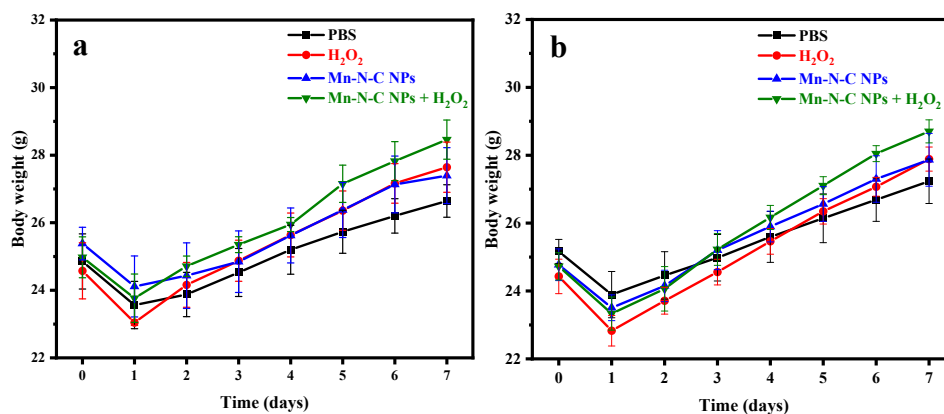

**Figure S5.** Body weight changes of mice after various treatments (a) without NIR and (b) with NIR (808 nm, 1.0 W cm<sup>-2</sup>, 3 min). Data presented as mean ± SD (n = 3).

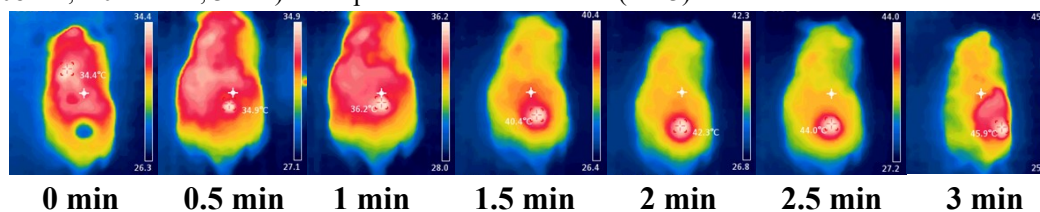

**Figure S6.** Thermal images of MRSA-infected wounds treated with Mn-N-C NPs+H<sub>2</sub>O<sub>2</sub> under NIR laser irradiation (NIR: 808 nm, 1.0 W cm<sup>-2</sup>, 3 min), ambient temperature is 21.9 °C, initial body temperature of mice is 34.4 °C.



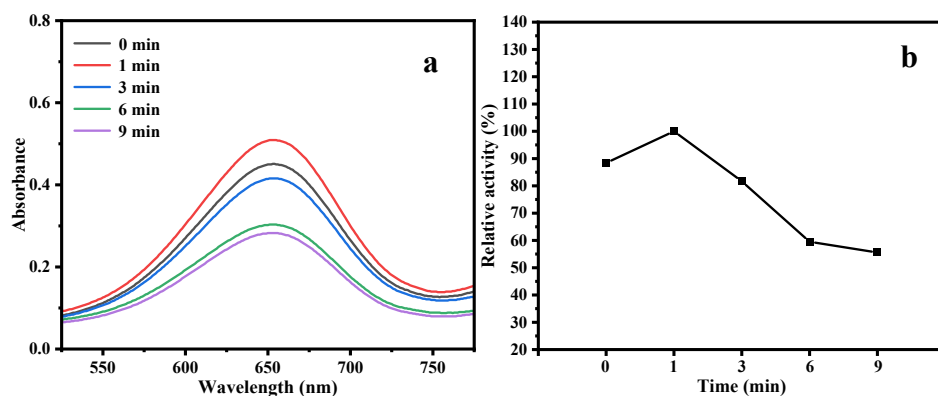

**Figure S7.** (a) UV-vis absorption spectra of TMB+Mn-N-C NPs+H<sub>2</sub>O<sub>2</sub> solution under 808 nm NIR laser irradiation for different times (0 min, 1 min, 3 min, 6 min, 9 min); (b) Effect of 808 nm NIR laser irradiation time on the peroxidase-like catalytic performance;

**Table S1.** Comparison of Mn-N-C NPs with other similar studies

| Name                                        | Mechanism                                | NIR-<br>photothermal<br>conversion<br>efficiency ( $\eta$ ) | The inhibition<br>rate of<br>S.aureus | The inhibition<br>rate of E.coli |
|---------------------------------------------|------------------------------------------|-------------------------------------------------------------|---------------------------------------|----------------------------------|
| CO@mPDA<br>NPs <sup>[48]</sup>              | CO-mediated PTT                          | 26.2%                                                       | 95.0%                                 | -                                |
| PEG-MoS <sub>2</sub><br>NFs <sup>[39]</sup> | Unimodal CDT<br>synergized with<br>PTT   | 43.72%                                                      | -                                     | > 99.0%                          |
| Mn-N-C NPs<br>(This work)                   | Multimodal CDT<br>synergized with<br>PTT | 40.13%                                                      | > 99.0%                               | > 98.0%                          |
